# Supplementary material for: Angiopoietin-2 predicts morbidity in adults with Fontan physiology
Source: PubMed Central journal article supplement (PMC6892891; doi:10.1038/s41598-019-54776-w), 2019-12-04
Supplement: 41598_2019_54776_MOESM1_ESM.pdf [file 41598_2019_54776_MOESM1_ESM.pdf]

## Angiotensin-2 predicts morbidity in adults with Fontan physiology

Aditya S. Shirali <sup>a‡</sup>, Gentian Lluri <sup>b‡\*</sup>, Pierre J. Guihard <sup>c</sup>, Miles B. Conrad <sup>d</sup>, Helen Kim <sup>e,f</sup>,  
Ludmila Pawlikowska <sup>e,f</sup>, Kristina I. Boström <sup>c</sup>, M. Luisa Iruela-Arispe <sup>g</sup>, Jamil A. Aboulhosn <sup>b\*</sup>

<sup>a</sup> Department of Surgery, University of California Los Angeles, Los Angeles, CA

<sup>b</sup> Ahmanson/UCLA Adult Congenital Heart Disease Center, Division of Cardiology, University of California Los Angeles, Los Angeles, CA

<sup>c</sup> Division of Cardiology, University of California Los Angeles, Los Angeles, CA

<sup>d</sup> Department of Radiology and Biomedical Imaging, University of California San Francisco, San Francisco, CA

<sup>e</sup> Center for Cerebrovascular Research, Department of Anesthesia and Perioperative Care, University of California San Francisco, San Francisco, CA

<sup>f</sup> Institute for Human Genetics, University of California San Francisco, San Francisco, CA

<sup>g</sup> Department of Molecular, Cell & Developmental Biology, Molecular Biology Institute and Jonsson Comprehensive Cancer Center, University of California Los Angeles, Los Angeles, CA

‡ These authors contributed equally to this work.

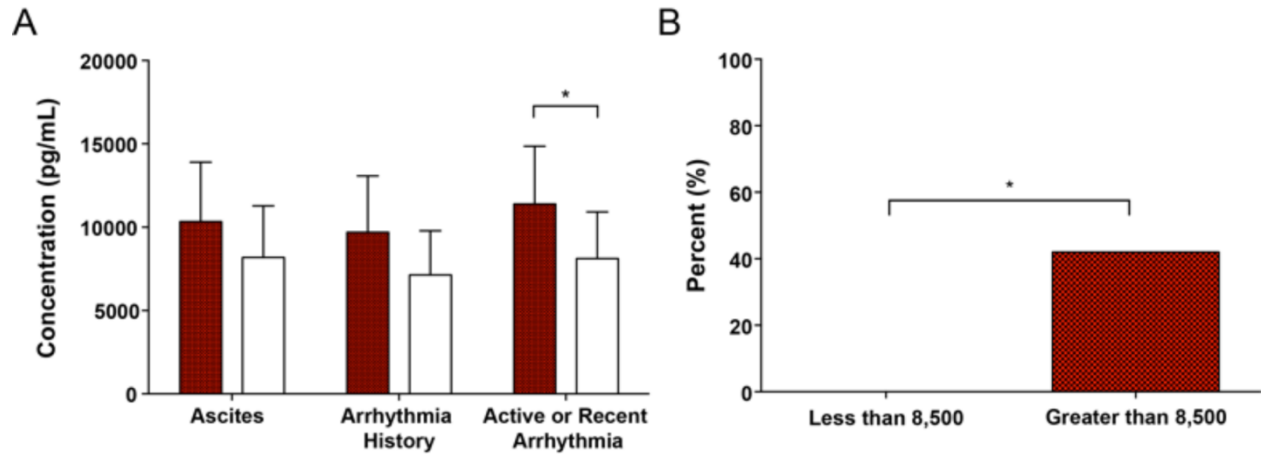

**Supplementary Figure 1.** A. Plasma angiotensin-converting enzyme 2 levels in patients with (red) and without (clear) ascites, history of arrhythmia and active or recent (within 6 months) arrhythmia. There is a significant difference in angiotensin-converting enzyme 2 in Fontan patients with active or recent arrhythmia ( $p < 0.05$ ). B. The percent of Fontan patients with active arrhythmia or recent arrhythmia (within 6 months) with angiotensin-converting enzyme 2 levels greater than 8,500 pg/mL ( $n=5/12$ ) and less than 8,500 pg/mL ( $n=0/13$ ). A significant difference exists between these groups ( $p < 0.05$ )
